# Supplementary material for: Four new lead(ii)–iridium(iii) heterobimetallic coordination frameworks: synthesis, structures, luminescence and oxygen-sensing properties
Source: Royal Society of Chemistry journal article supplement (doi:10.1039/c4ce02457e), 2015-01-01
Supplement: c4ce02457e1.pdf [file c4ce02457e1.pdf]

# Four New Lead(II)-Iridium(III) Heterobimetallic Coordination Frameworks: Synthesis, Structures, Luminescence and Oxygen-sensing Properties

Yi-Ting Chen,<sup>a</sup> Chun-Yen Lin,<sup>a</sup> Gene-Hsiang Lee,<sup>b</sup> and Mei-Lin Ho<sup>a\*</sup>

<sup>a</sup> Department of Chemistry, Soochow University, Taipei, Taiwan.

<sup>b</sup> Instrumentation Center, National Taiwan University, Taipei, Taiwan.

E-mail: [meilin\\_ho@scu.edu.tw](mailto:meilin_ho@scu.edu.tw)

**RECEIVED DATE** (to be automatically inserted after your manuscript is  
accepted if required according to the journal that you are submitting your paper  
to)

Department of Chemistry, Soochow University, Taipei, Taiwan. Fax:

+886-2-28811053; Tel: +886-2-28819471 ext 6827; E-mail: [meilin\\_ho@scu.edu.tw](mailto:meilin_ho@scu.edu.tw)

**Supplementary materials:**

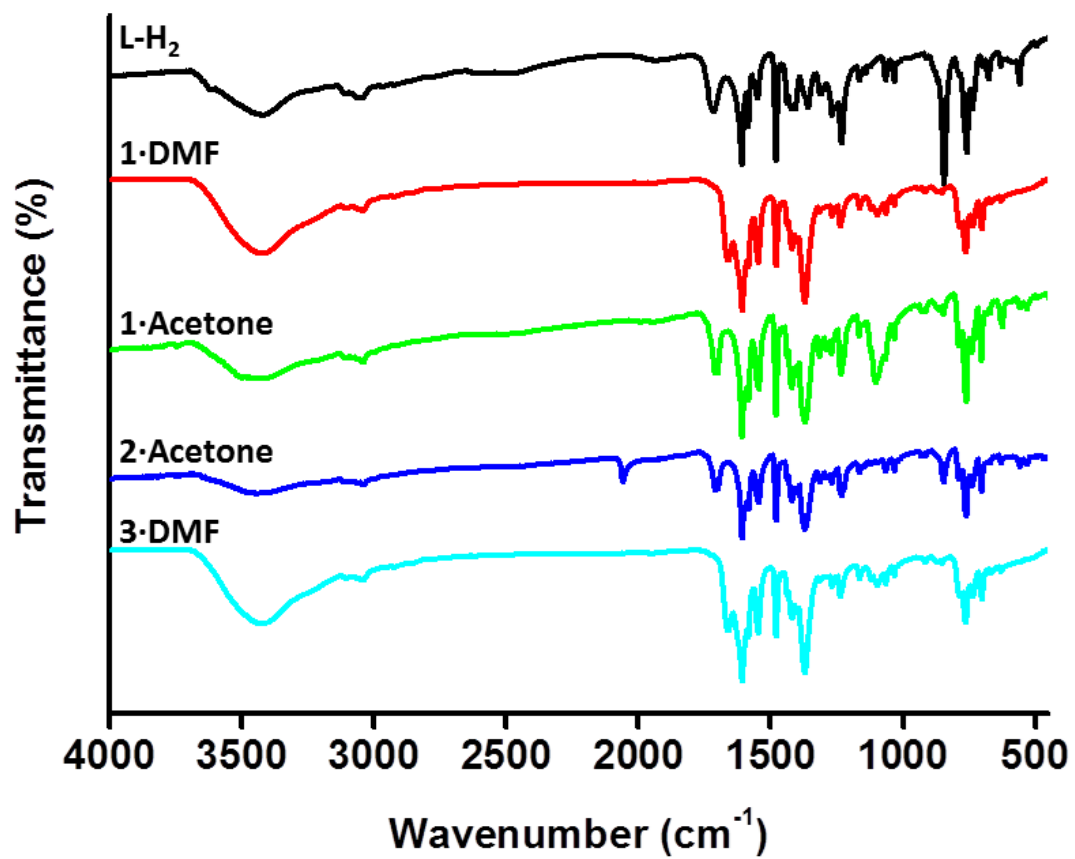

Fig. S1 FT-IR spectra of L-H<sub>2</sub>, 1·DMF, 1·Acetone, 2·Acetone and 3·DMF.

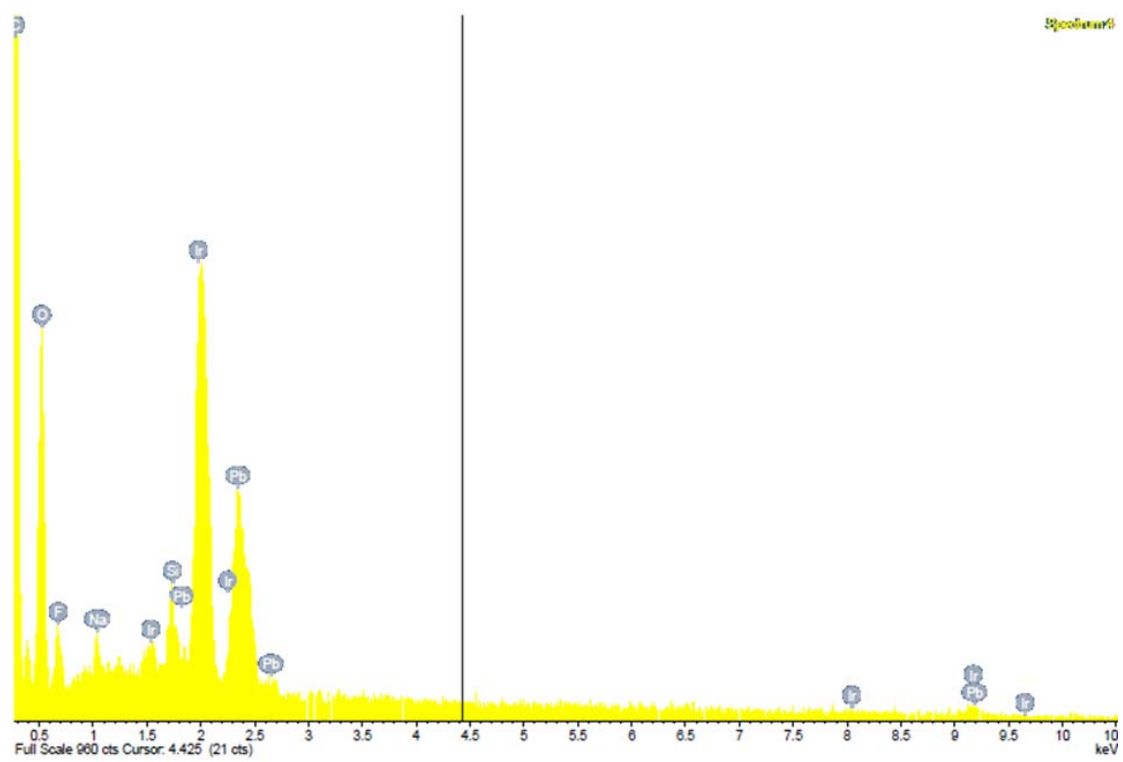

**Fig. S2** EDX data for **2-Acetone**.

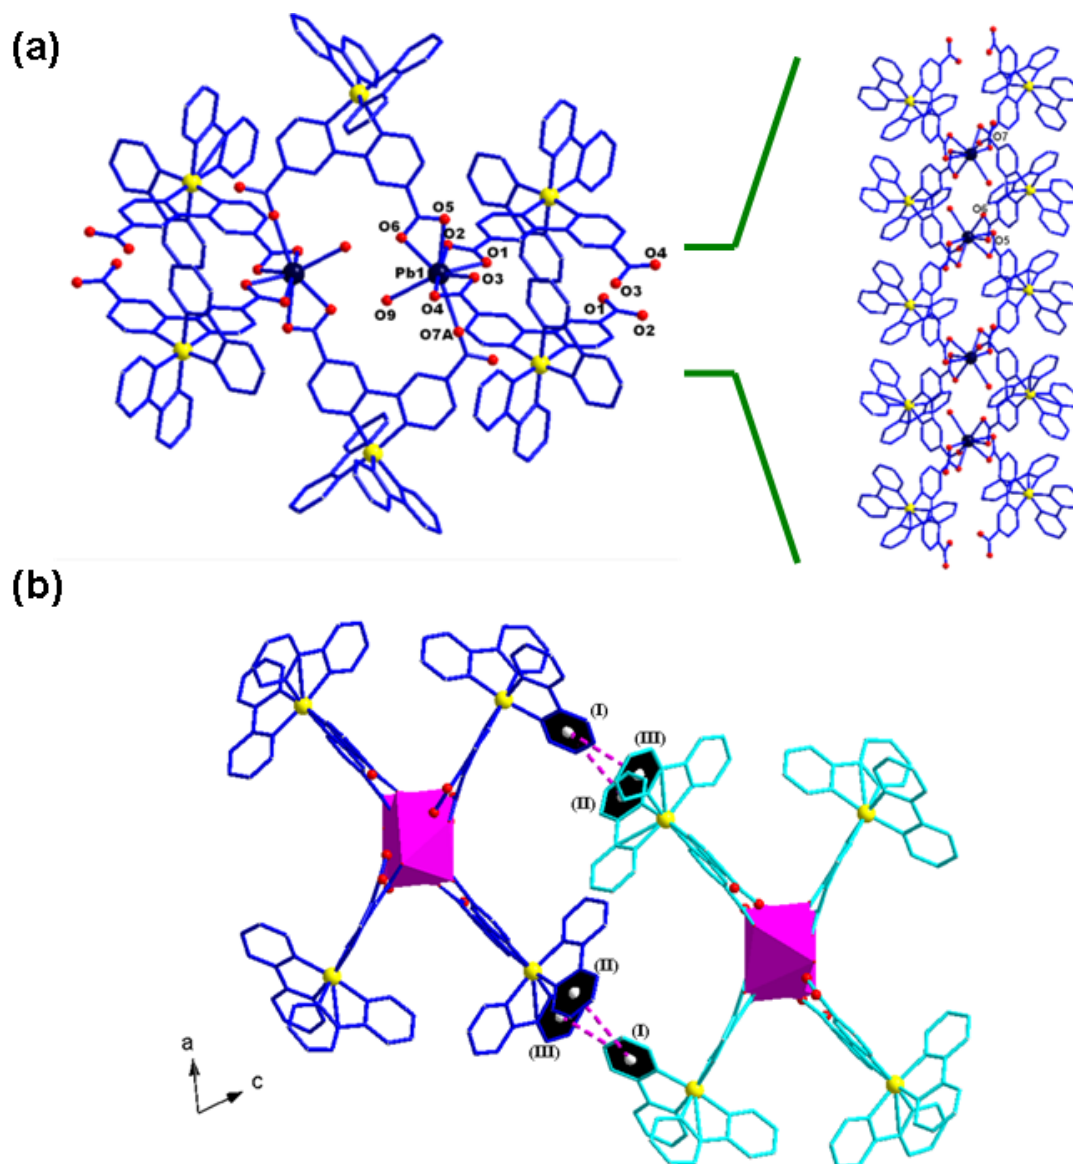

**Fig. S3** (a) The coordination environment of Pb(II) in **1·Acetone**. Hydrogen atoms are omitted for clarity. (right) View of a 1D linear chain in **1·Acetone** along the crystallographic *a*-axis. (b) Polyhedral representation of the alternation in an AB/fashion (in blue and cyan) of **1·Acetone** viewed down the *b*-axis. Magenta colored polyhedral represent Pb(II) centers. Dotted lines indicate the  $\pi - \pi$  interactions found.

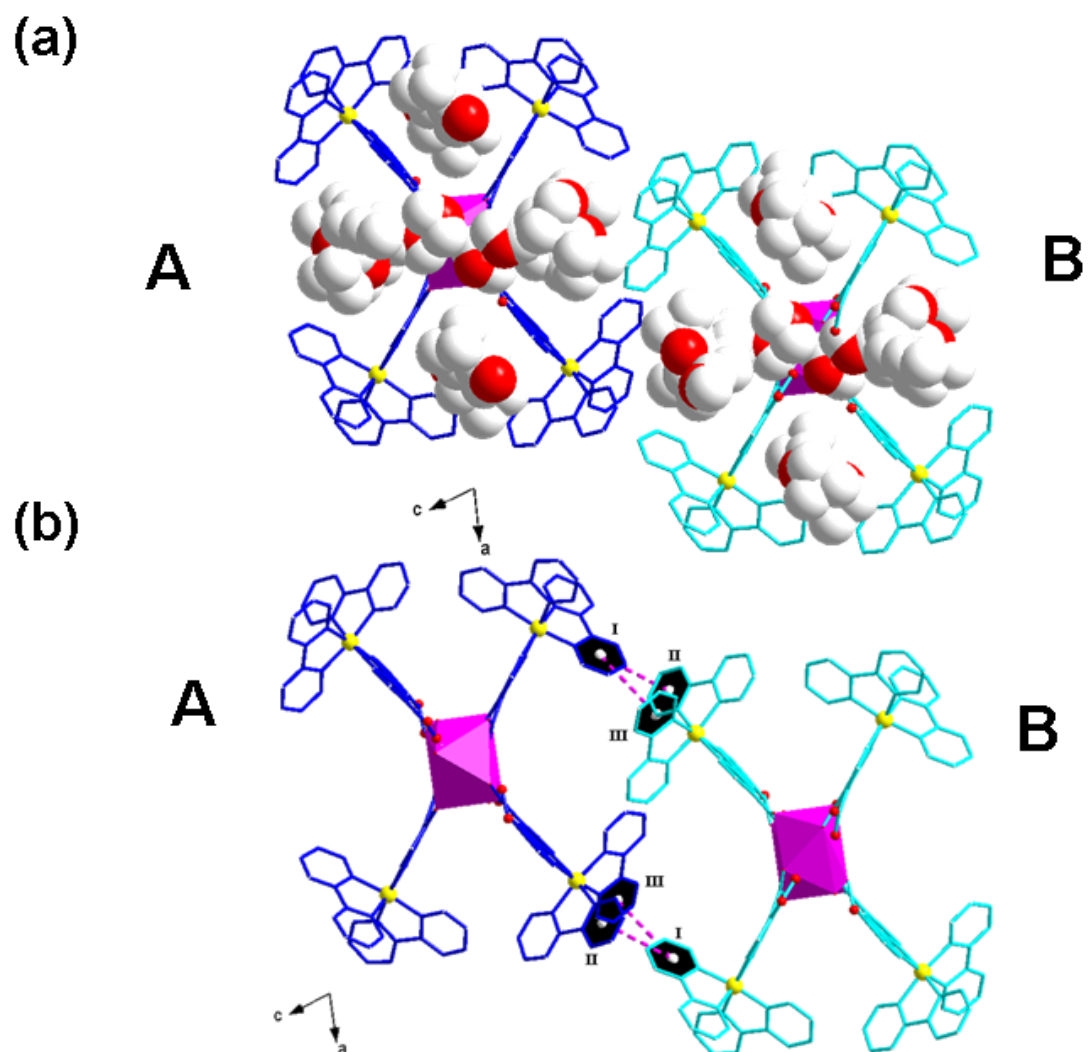

**Fig. S4** (a) Polyhedral representation of the alternation in an AB/fashion (in blue and green) of **2-Acetone** viewed down the *b*-axis. Magenta colored polyhedral represent Pb(II) centers. (b) Dotted lines indicate the  $\pi - \pi$  interactions found.

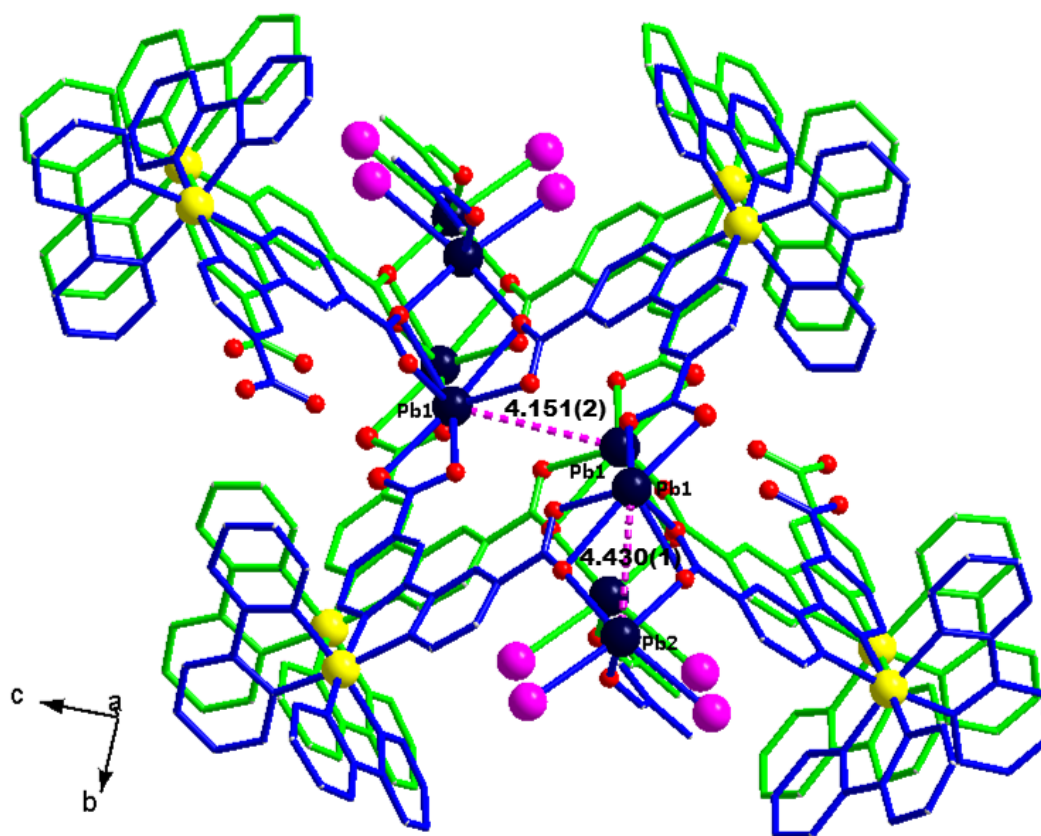

**Fig. S5** Selected pairs of molecules from the structure of **3·DMF** along the *a*-axis. Dotted lines indicate the edge-to-face interactions found. Blue color denoted the upper layer, and the green color denoted the next layer.

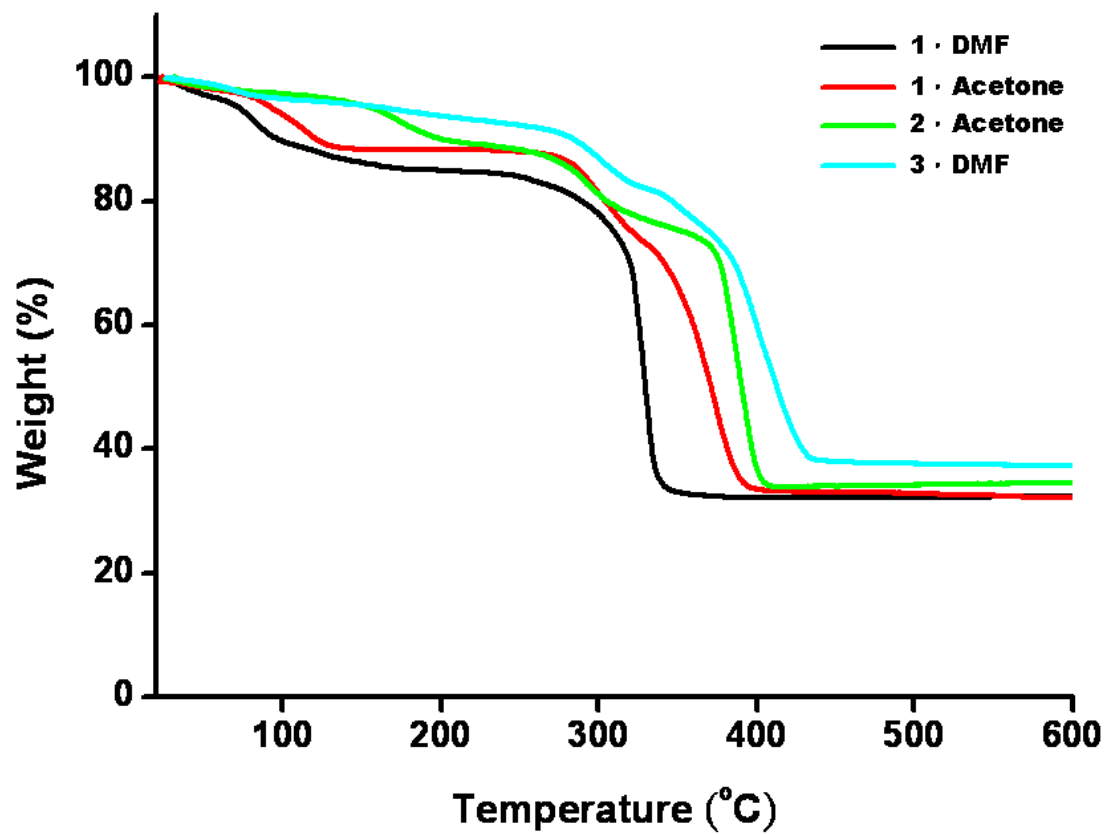

Fig. S6 TG curves of 1·DMF—3·DMF.

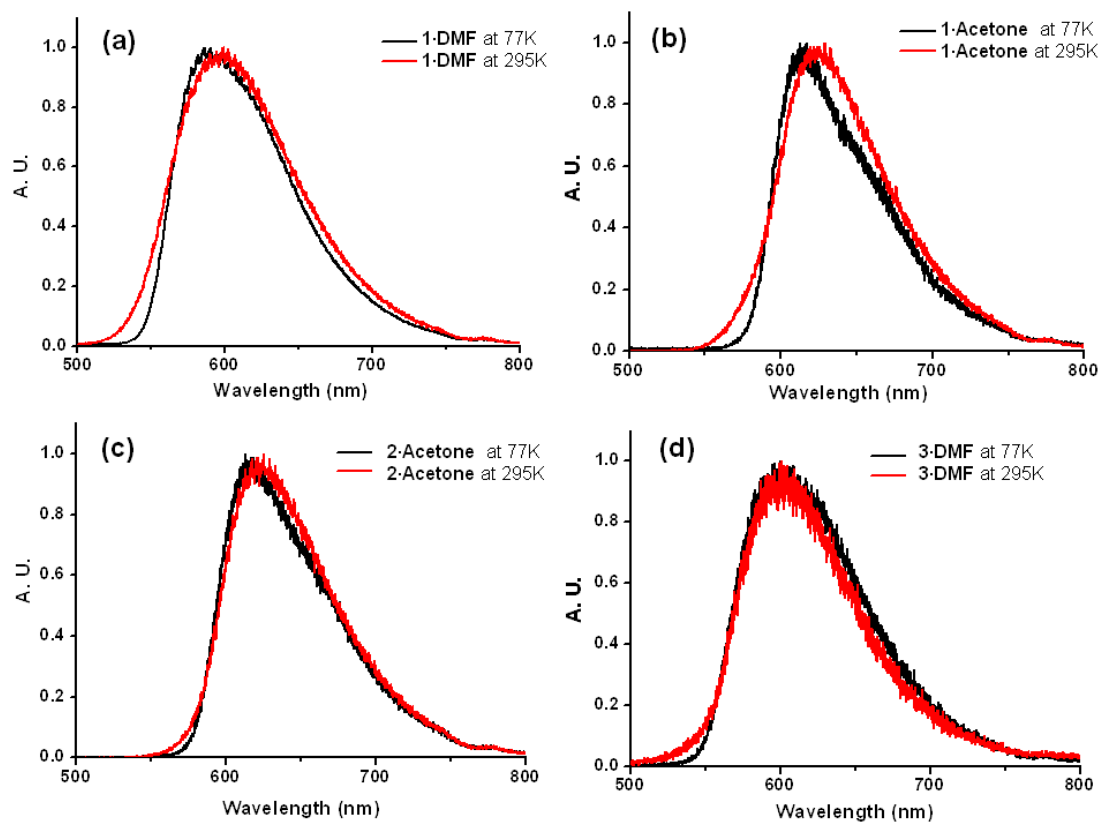

**Fig. S7** The normalized emission spectrum of **1-DMF—3-DMF** in single crystal at 295 K and at 77K.  $\lambda_{\text{ex}} = 405 \text{ nm}$ .



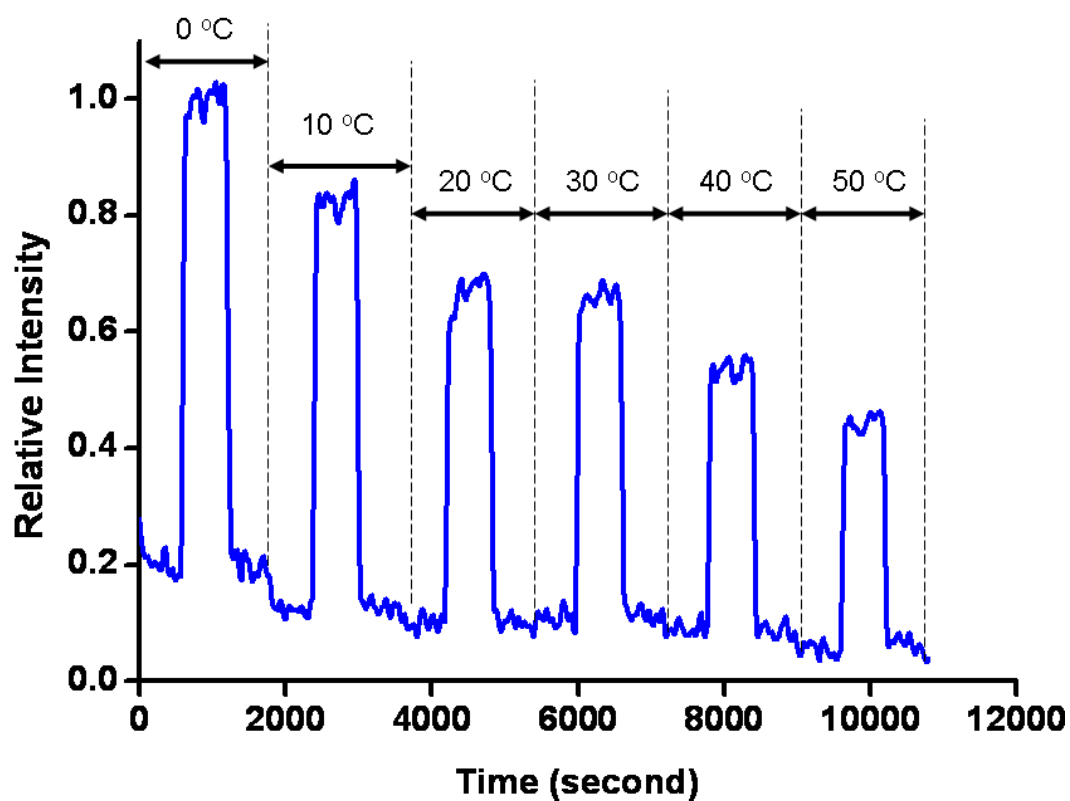

**Fig. S8** Relative luminescence changes of **3·DMF** in single crystal at 0, 10, 20, 30, 40, and 50 °C, respectively upon alternating exposure to 100% nitrogen and 100% oxygen atmosphere.

**Table S1.** Selected Bond Lengths (Å) and Angles (°) for complexes**1·DMF—3·DMF.<sup>a</sup>**

| <b>1·DMF</b>     |           |                  |            |                    |            |                   |            |
|------------------|-----------|------------------|------------|--------------------|------------|-------------------|------------|
| Pb(1)-O(1)       | 2.476(9)  | O(1)-Pb(1)-O(7A) | 96.8(3)    | O(1)-Pb(1)-O(20B)  | 84.4(4)    | O(5)-Pb(1)-O(2)   | 118.4(3)   |
| Pb(1)-O(7A)      | 2.521(9)  | O(1)-Pb(1)-O(5)  | 79.2(3)    | O(7A)-Pb(1)-O(20B) | 156.4(4)   | O(6)-Pb(1)-O(2)   | 128.8(3)   |
| Pb(1)-O(5)       | 2.606(5)  | O(7A)-Pb(1)-O(5) | 128.0(3)   | O(5)-Pb(1)-O(20B)  | 75.5(3)    | O(20B)-Pb(1)-O(2) | 73.8(4)    |
| Pb(1)-O(6)       | 2.637(6)  | O(1)-Pb(1)-O(6)  | 85.9(3)    | O(6)-Pb(1)-O(20B)  | 125.4(4)   |                   |            |
| Pb(1)-O(2)       | 2.703(11) | O(7A)-Pb(1)-O(6) | 78.2(3)    | O(1)-Pb(1)-O(2)    | 45.9(3)    |                   |            |
| Pb(1)-O(20B)     | 2.684(15) | O(5)-Pb(1)-O(6)  | 49.90(17)  | O(7A)-Pb(1)-O(2)   | 90.0(3)    |                   |            |
| <b>1·Acetone</b> |           |                  |            |                    |            |                   |            |
| Pb(1)-O(3)       | 2.409(7)  | O(3)-Pb(1)-O(1)  | 78.5(2)    | O(3)-Pb(1)-O(9)    | 140.4(3)   | O(2)-Pb(1)-O(4)   | 169.8(3)   |
| Pb(1)-O(6)       | 2.475(7)  | O(6)-Pb(1)-O(1)  | 125.9(3)   | O(6)-Pb(1)-O(9)    | 79.7(3)    | O(9)-Pb(1)-O(4)   | 95.3(2)    |
| Pb(1)-O(1)       | 2.507(6)  | O(3)-Pb(1)-O(5)  | 78.8(3)    | O(1)-Pb(1)-O(9)    | 130.6(3)   | O(3)-Pb(1)-O(7A)  | 69.3(3)    |
| Pb(1)-O(5)       | 2.591(8)  | O(6)-Pb(1)-O(5)  | 49.3(2)    | O(5)-Pb(1)-O(9)    | 126.0(2)   | O(6)-Pb(1)-O(7A)  | 144.5(3)   |
| Pb(1)-O(2)       | 2.596(7)  | O(1)-Pb(1)-O(5)  | 80.7(2)    | O(2)-Pb(1)-O(9)    | 93.7(3)    | O(1)-Pb(1)-O(7A)  | 88.4(3)    |
| Pb(1)-O(9)       | 2.796(8)  | O(3)-Pb(1)-O(2)  | 124.7(2)   | O(3)-Pb(1)-O(4)    | 47.6(2)    | O(5)-Pb(1)-O(7A)  | 147.7(2)   |
| Pb(1)-O(4)       | 2.804(8)  | O(6)-Pb(1)-O(2)  | 91.6(3)    | O(6)-Pb(1)-O(4)    | 85.3(3)    | O(2)-Pb(1)-O(7A)  | 120.8(3)   |
| Pb(1)-O(7A)      | 2.815(9)  | O(1)-Pb(1)-O(2)  | 50.4(2)    | O(1)-Pb(1)-O(4)    | 124.9(2)   | O(9)-Pb(1)-O(7A)  | 83.8(2)    |
| O(3)-Pb(1)-O(6)  | 105.7(3)  | O(5)-Pb(1)-O(2)  | 74.2(3)    | O(5)-Pb(1)-O(4)    | 96.6(3)    | O(4)-Pb(1)-O(7A)  | 65.2(3)    |
| <b>2·Acetone</b> |           |                  |            |                    |            |                   |            |
| Pb(1)-O(3A)      | 2.426(5)  | O(3A)-Pb(1)-O(2) | 123.49(19) | O(3A)-Pb(1)-O(7B)  | 81.5(4)    | O(5)-Pb(1)-O(4A)  | 102.2(3)   |
| Pb(1)-O(6)       | 2.536(5)  | O(6)-Pb(1)-O(2)  | 97.2(2)    | O(6)-Pb(1)-O(7B)   | 155.6(4)   | O(7B)-Pb(1)-O(4A) | 81.2(5)    |
| Pb(1)-O(2)       | 2.620(6)  | O(3A)-Pb(1)-O(1) | 75.64(17)  | O(2)-Pb(1)-O(7B)   | 97.1(5)    | O(3A)-Pb(1)-O(9)  | 135.9(2)   |
| Pb(1)-O(1)       | 2.624(5)  | O(6)-Pb(1)-O(1)  | 127.7(2)   | O(1)-Pb(1)-O(7B)   | 76.4(4)    | O(6)-Pb(1)-O(9)   | 75.2(2)    |
| Pb(1)-O(5)       | 2.645(6)  | O(2)-Pb(1)-O(1)  | 49.94(17)  | O(5)-Pb(1)-O(7B)   | 153.3(4)   | O(2)-Pb(1)-O(9)   | 99.3(2)    |
| Pb(1)-O(7B)      | 2.71(2)   | O(3A)-Pb(1)-O(5) | 80.7(2)    | O(3A)-Pb(1)-O(4A)  | 50.3(2)    | O(1)-Pb(1)-O(9)   | 138.96(19) |
| Pb(1)-O(4A)      | 2.758(7)  | O(6)-Pb(1)-O(5)  | 50.35(19)  | O(6)-Pb(1)-O(4A)   | 86.5(2)    | O(5)-Pb(1)-O(9)   | 123.47(17) |
| Pb(1)-O(9)       | 2.814(6)  | O(2)-Pb(1)-O(5)  | 76.6(2)    | O(2)-Pb(1)-O(4A)   | 173.70(19) | O(7A)-Pb(1)-O(9)  | 83.0(4)    |
| O(3A)-Pb(1)-O(6) | 106.5(2)  | O(1)-Pb(1)-O(5)  | 79.99(17)  | O(1)-Pb(1)-O(4A)   | 123.83(18) | O(4A)-Pb(1)-O(9)  | 86.6(2)    |
| <b>3·DMF</b>     |           |                  |            |                    |            |                   |            |
| Pb(1)-O(5)       | 2.427(8)  | Pb(2)-I(1)       | 3.0732(10) | O(2)-Pb(1)-O(1)    | 50.1(2)    | O(9)-Pb(2)-O(6)   | 77.0(3)    |
| Pb(1)-O(2)       | 2.454(8)  | Pb(2)-I(2)       | 3.0479(10) | O(3)-Pb(1)-O(1)    | 124.3(3)   | O(4)-Pb(2)-O(6)   | 71.9(5)    |
| Pb(1)-O(3)       | 2.465(8)  | O(5)-Pb(1)-O(2)  | 76.7(3)    | O(6)-Pb(1)-O(1)    | 103.5(3)   | O(9)-Pb(2)-I(2)   | 86.9(2)    |
| Pb(1)-O(6)       | 2.696(8)  | O(5)-Pb(1)-O(3)  | 81.6(3)    | O(5)-Pb(1)-O(4)    | 92.5(4)    | O(4)-Pb(2)-I(2)   | 93.9(5)    |

|            |          |                 |          |                 |          |                 |           |
|------------|----------|-----------------|----------|-----------------|----------|-----------------|-----------|
| Pb(1)-O(1) | 2.742(8) | O(2)-Pb(1)-O(3) | 75.1(3)  | O(2)-Pb(1)-O(4) | 125.9(5) | O(6)-Pb(2)-I(2) | 160.4(2)  |
| Pb(1)-O(4) | 2.77(2)  | O(5)-Pb(1)-O(6) | 50.7(3)  | O(3)-Pb(1)-O(4) | 50.7(5)  | O(9)-Pb(2)-I(1) | 86.4(2)   |
| Pb(2)-O(9) | 2.391(9) | O(2)-Pb(1)-O(6) | 126.8(3) | O(6)-Pb(1)-O(4) | 70.6(5)  | O(4)-Pb(2)-I(1) | 156.6(4)  |
| Pb(2)-O(4) | 2.61(3)  | O(3)-Pb(1)-O(6) | 101.2(3) | O(1)-Pb(1)-O(4) | 169.3(4) | O(6)-Pb(2)-I(1) | 88.41(18) |
| Pb(2)-O(6) | 2.765(9) | O(5)-Pb(1)-O(1) | 77.1(3)  | O(9)-Pb(2)-O(4) | 77.1(5)  | I(2)-Pb(2)-I(1) | 101.74(3) |

<sup>a</sup>Symmetry codes for **1·DMF**: (A)  $-x+1, -y+1, -z+1$ ; (B)  $x, y+1, z$ . Symmetry code for **1·Acetone**: (A)  $-x+1, -y+1, -z+1$ .  
Symmetry code for **2·Acetone**: (A)  $-x+1, -y+2, -z$ ; (B)  $-x+1, -y+1, -z$ .

**Table S2.** Selected Hydrogen Bond Data for complexes **1·DMF** and **3·DMF**.<sup>a</sup>

| D-H...A (Å)                        | D-H (Å) | H...A (Å) | D...A (Å) | ∠ D-H...A(°) |
|------------------------------------|---------|-----------|-----------|--------------|
| <b>1·DMF</b>                       |         |           |           |              |
| C(8)-H(8)...O(9) <sup>iv</sup>     | 0.95    | 2.42      | 3.361(12) | 172          |
| C(37)-H(37)...O(10) <sup>vii</sup> | 0.95    | 2.53      | 3.443(13) | 162          |
| <b>3·DMF</b>                       |         |           |           |              |
| O(11)-H(11B)...O(7) <sup>ii</sup>  | 0.85    | 2.00      | 2.844(13) | 172          |
| O(11)-H(11A)...O(1) <sup>i</sup>   | 0.85    | 2.21      | 3.043(13) | 166          |
| C(11)-H(11)...O(1) <sup>ii</sup>   | 0.93    | 2.58      | 3.351(16) | 140          |

<sup>a</sup>Symmetry codes for **1·DMF**: (iv) 1-x, -y, -z; (vii) -1+x, y, z. Symmetry code for **3·DMF**: (i) 1-x, 1-y, 1-z; (ii) -x, 1-y, 1-z.

**Table S3.**  $\pi$ - $\pi$  interactions for complexes **1·Acetone**, **2·Acetone**, and **3·DMF**.

| Interaction      | Ring position | Symmetry code  | Distance centroids | Dihedral angle |
|------------------|---------------|----------------|--------------------|----------------|
| <b>1·Acetone</b> | I...II        | -2-x, 6-y, 2-z | 4.828(4)           | 79.12(61)      |
|                  | I...III       | -2-x, 6-y, 2-z | 4.502(3)           | 76.70(53)      |
| <b>2·Acetone</b> | I...II        | x, -1+y, z     | 4.550(3)           | 78.24(43)      |
|                  | I...III       | x, -1+y, z     | 4.930(4)           | 82.62(42)      |
| <b>3·DMF</b>     | I...II        | 1-x, 1-y, 1-z  | 3.815(2)           | 66.22(75)      |
